# Supplementary material
Source: PubMed Central journal article supplement (PMC11386880)

1 **Supplementary Table S1.** Cisgene segregation pattern in *HvGSI-1* cisgenic barley lines. A) 12  
 2 cisgenic T0 lines were analysed for segregation of the inserted cisgene in the T1 generation using PCR.  
 3 The resulting ratios were used to estimate the number of cisgene inserts. Cisgene detection was expected  
 4 to occur at a ratio of 3:1 for a single insert line and 15:1 for a double insert line. B) T1 lines with a single  
 5 cisgene insert were analysed for cisgene segregation in the T2 generation and the resulting ratios were  
 6 used to determine whether the lines were homozygous or hemizygous for the inserted cisgene. Cisgene  
 7 detection was expected to occur at a ratio of 1 for a homozygous line and 3:1 for a hemizygous line.

8 A)

| Genetic background |                            | Observed segregation |              |                            | Expected no. of cisgene neg. |                       | Evaluation             |
|--------------------|----------------------------|----------------------|--------------|----------------------------|------------------------------|-----------------------|------------------------|
| T0 line            | No. of T1 samples analysed | Cisgene pos.         | Cisgene neg. | Ratio of cisgene pos./neg. | If single insert line        | If double insert line |                        |
| 1                  | 18                         | 10                   | 8            | 1.25:1                     | 4-5                          | 1-2                   | Single insert          |
| 2                  | 41                         | 29                   | 12           | 2.42:1                     | 10-11                        | 2-3                   | Single insert          |
| 3                  | 40                         | 30                   | 10           | 3:1                        | 10                           | 2-3                   | Single insert          |
| 4                  | 41                         | 29                   | 12           | 2.42:1                     | 10-11                        | 2-3                   | Single insert          |
| 5                  | 41                         | 40                   | 1            | 40:1                       | 10-11                        | 2-3                   | Double/multiple insert |
| 6                  | 41                         | 33                   | 8            | 4.13:1                     | 10-11                        | 2-3                   | Single insert          |
| 7                  | 18                         | 18                   | 0            |                            | 4-5                          | 1-2                   | Double/multiple insert |
| 8                  | 18                         | 18                   | 0            |                            | 4-5                          | 1-2                   | Double/multiple insert |
| 9                  | 41                         | 41                   | 0            |                            | 10-11                        | 2-3                   | Double/multiple insert |
| 10                 | 18                         | 18                   | 0            |                            | 4-5                          | 1-2                   | Double/multiple insert |
| 11                 | 14                         | 11                   | 3            | 3.67:1                     | 3-4                          | 0-1                   | Single insert          |
| 12                 | 18                         | 18                   | 0            |                            | 4-5                          | 1-2                   | Double/multiple insert |

9

10 B)

| Genetic background |         | Observed segregation       |              |              | Expected no. of cisgene neg. |               | Evaluation |
|--------------------|---------|----------------------------|--------------|--------------|------------------------------|---------------|------------|
| T0 line            | T1 line | No. of T2 samples analysed | Cisgene pos. | Cisgene neg. | If homozygous                | If hemizygous |            |
| 2                  | 2.1     | 14                         | 11           | 3            | 0                            | 3-4           | Hemizygous |
| 2                  | 2.2     | 18                         | 18           | 0            | 0                            | 4-5           | Homozygous |
| 3                  | 3.2     | 18                         | 18           | 0            | 0                            | 4-5           | Homozygous |
| 3                  | 3.4     | 17                         | 13           | 4            | 0                            | 4-5           | Hemizygous |
| 3                  | 3.10    | 12                         | 12           | 0            | 0                            | 3             | Homozygous |
| 4                  | 4.5     | 19                         | 19           | 0            | 0                            | 4-5           | Homozygous |
| 4                  | 4.8     | 19                         | 14           | 5            | 0                            | 4-5           | Hemizygous |
| 11                 | 11.1    | 18                         | 18           | 0            | 0                            | 4-5           | Homozygous |
| 11                 | 11.2    | 18                         | 15           | 3            | 0                            | 4-5           | Hemizygous |
| 11                 | 11.3    | 16                         | 16           | 0            | 0                            | 4             | Homozygous |

11

12

13

14

15

16

17

18

19 **Supplementary Figure S1**

20

21

22

23

24

25

26

27

28

29

30

31

32

33

34

35

36

37

38

39 **Figure S1** Initial characterization of *HvGS1-1* cisgenic T3 lines 2.2, 4.5, 11.1 and 11.3 together  
40 with the wild-type. (a) Grain yield, (b) harvest index and (c) nitrogen utilization efficiency  
41 (NUE) of plants at maturity growing with medium (0.45 g N L<sup>-1</sup> soil) N supply in a greenhouse  
42 experiment conducted from December 22<sup>nd</sup> 2014 to April 10<sup>th</sup> 2015. Data are presented as  
43 means ± SE (n=20). Different letters indicate significant differences (p<0.05, Fischer LSD)  
44 between *HvGS1-1* cisgenic lines and wild-type.

45

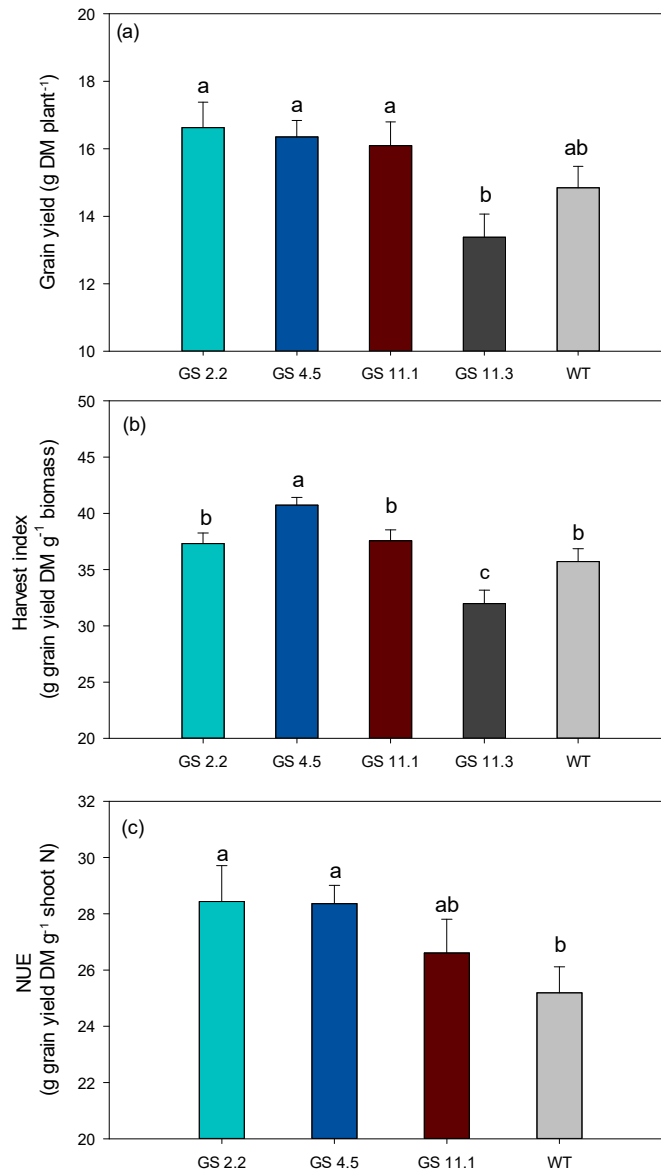

46

47 **Supplementary Figure S2**

48

49

50

51

52

53

54

55

56

57

58

59

60

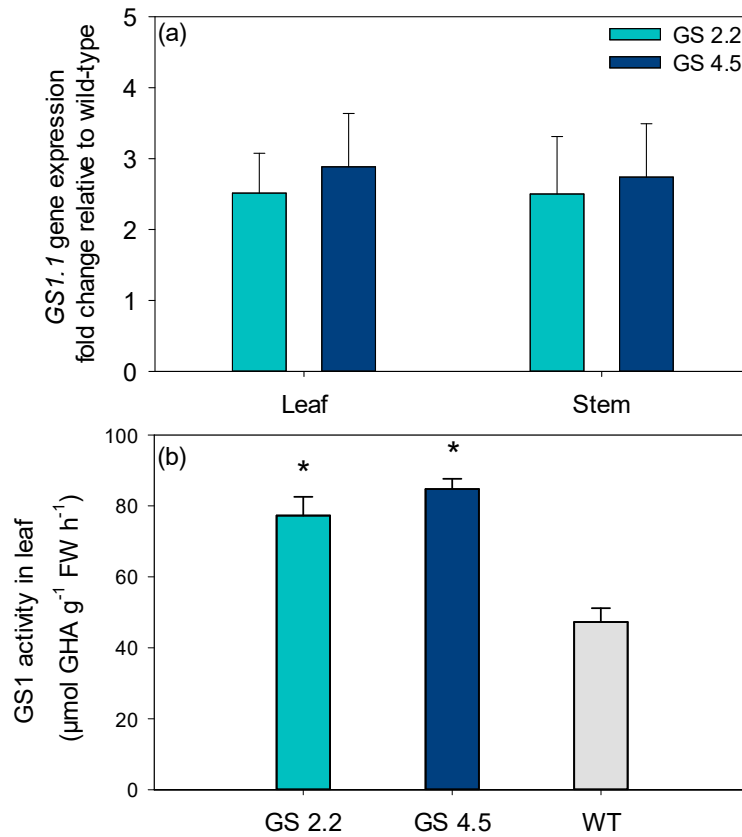

61 **Figure S2** *GS1-1* gene expression and GS1 activity in the two youngest fully developed leaves  
62 of 28-day-old plants of the two T3 *HvGS1-1* cisgenic lines 2.2 and 4.5. (a) GS1-1 gene  
63 expression with values expressed relative to wild-type plants. (b) GS1 enzyme activity. Data  
64 represents mean values  $\pm$  SE (n=4). Asterisks (\*) indicates significant differences in GS1  
65 activity between the cisgenic lines and the wild-type.

66

67

68

69

70

71

72

73

74 **Supplementary Figure S3**

75

76

77

78

79

80

81

82

83

84

85

86

87

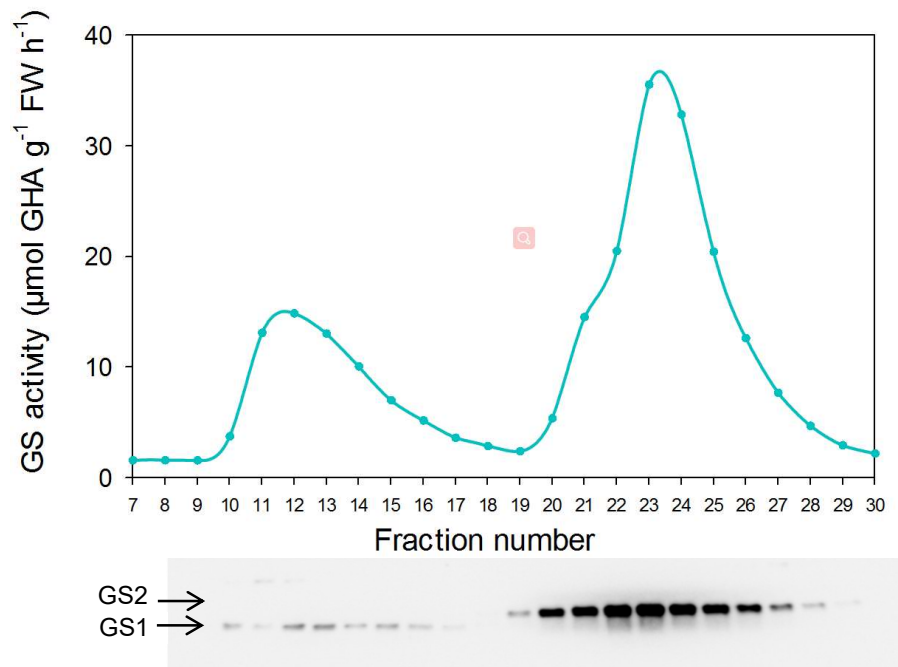

88 **Figure S3** Separate activities of cytosolic GS (GS1) and chloroplastic GS (GS2) in leaves of  
89 28-day-old wild-type plants. GS1 and GS2 were separated on a Mono Q 5/50 GL anion column  
90 using Fast protein liquid chromatography (FPLC). Their activities in the different elution  
91 fractions were measured by the transferase assay and the product  $\gamma$ -GHA ( $\gamma$ -glutamyl  
92 hydroxamate) was quantified spectrophotometrically at 540 nm using synthetic GHA to prepare  
93 calibration standards. The first peak corresponds to GS1 and the second peak to GS2, as  
94 confirmed by western blotting using an anti-GS antibody [GS1, lower band, 40 kDa; GS2, upper  
95 band, 45 kDa].

96

97

98

99

100

101

102

103

104

105 **Supplementary Figure S4**

106 Schematic drawing of the structure of the *HvGS1.1* gene used for transformation.

107

108

109

110

111

112

113

114

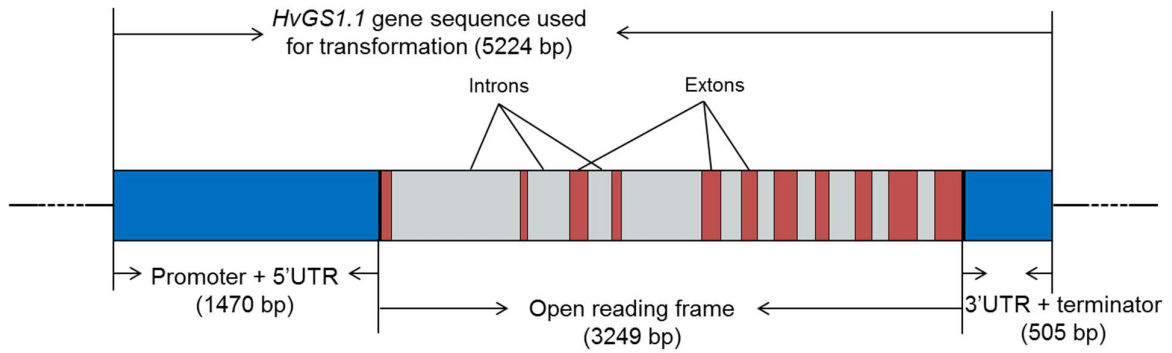

Supplement: PBI-17-1209-s001.pdf [file PBI-17-1209-s001.pdf]
